# Supplementary material for: Organic–inorganic binary mixture matrix for comprehensive laser-desorption ionization mass spectrometric analysis and imaging of medium-size molecules including phospholipids, glycerolipids, and oligosaccharides
Source: Royal Society of Chemistry journal article supplement (doi:10.1039/c6ra20469d), 2016-01-01
Supplement: c6ra20469d1.pdf [file c6ra20469d1.pdf]

Supplementary Information:

Organic-Inorganic Binary Mixture Matrix for Comprehensive Laser-desorption  
Ionization Mass Spectrometric Analysis and Imaging of Medium-size Molecules  
including Phospholipids, Glycerolipids, and Oligosaccharides

Adam D. Feenstra<sup>a,b</sup>, Kelly C. O'Neill<sup>a</sup>, Gargey B. Yagnik<sup>a,b</sup>, and Young Jin Lee<sup>a,b</sup>

<sup>a</sup>Department of Chemistry, Iowa State University, Ames, IA 50011, USA

<sup>b</sup>Ames Laboratory-US DOE, Ames, IA 50011, USA

Correspondence to: [yjlee@iastate.edu](mailto:yjlee@iastate.edu)

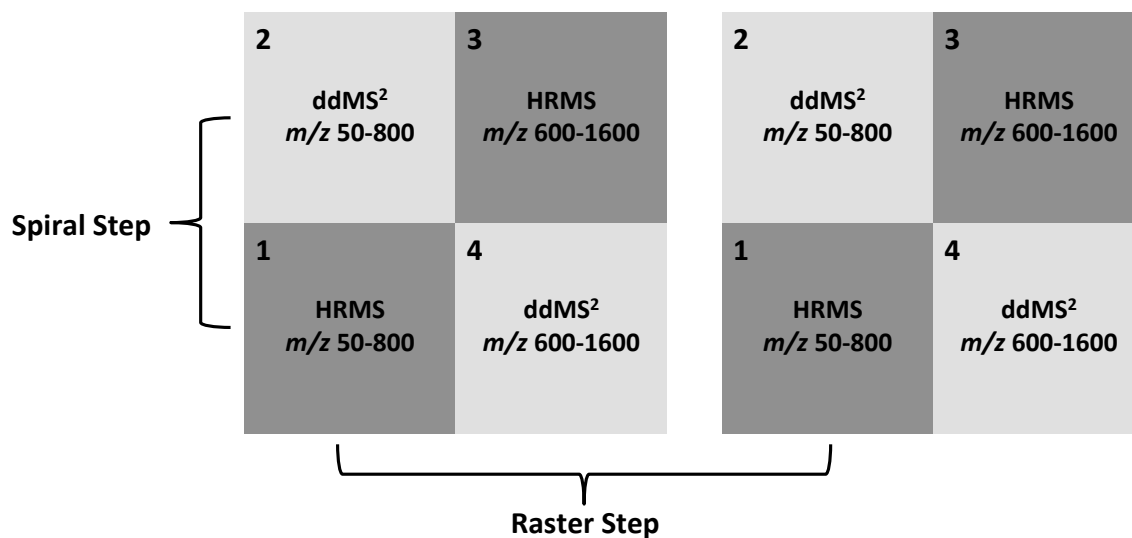

**Figure S1.** A schematic diagram of the multiplex MS imaging strategy used in this work. In a multiplex data acquisition, each imaging raster step is broken up into multiple spiral steps that can be defined by different MS parameters. In this work, the first and third spiral steps were high resolution Orbitrap scans (HRMS) in the low and high mass range, respectively. The second and fourth steps were data dependent MS/MS scans (ddMS<sup>2</sup>) from the preceding HRMS scan.

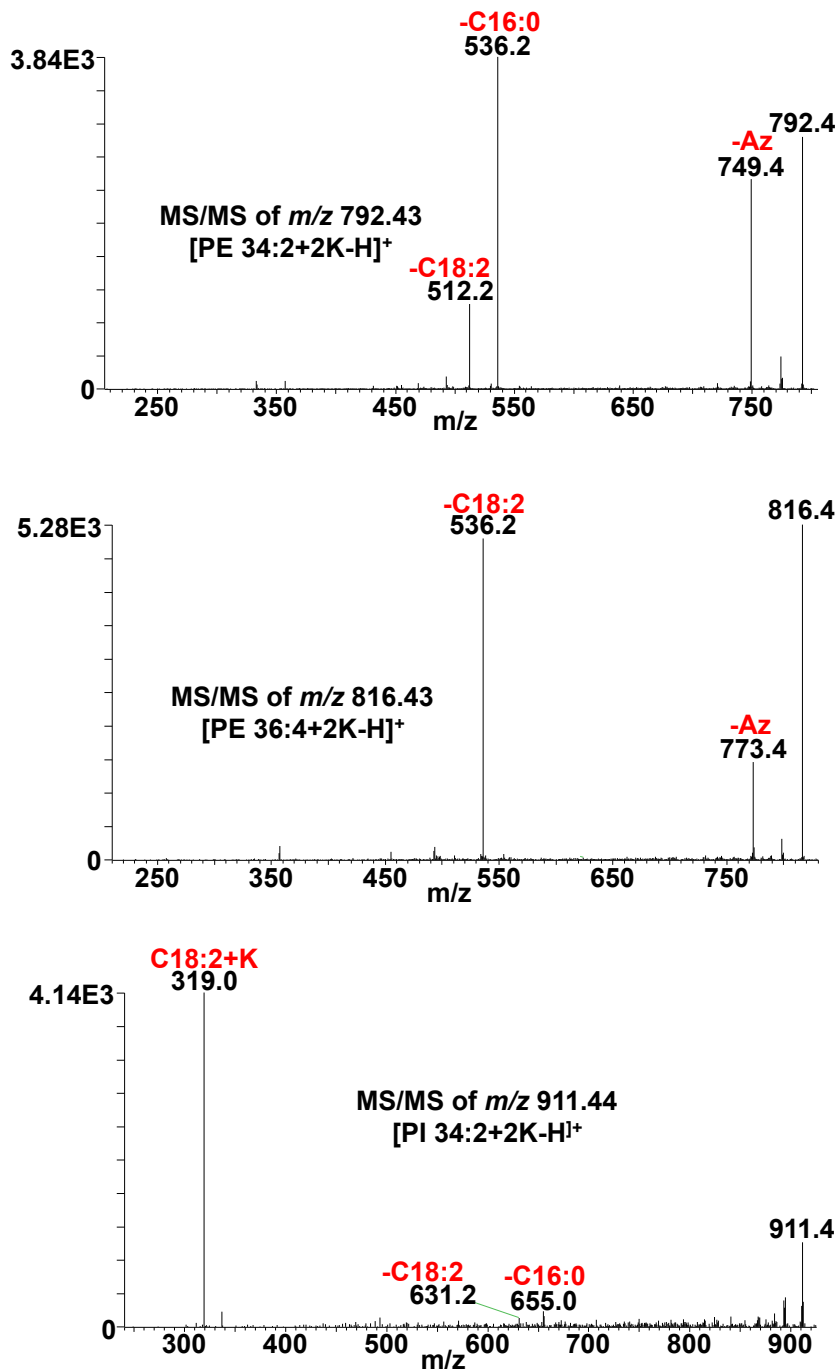

**Figure S2.** MS/MS spectra for [PE 34:2+2K-H]<sup>+</sup> (Top), [PE 36:4+2K-H]<sup>+</sup> (Middle), and [PI 34:2+2K-H]<sup>+</sup> (Bottom). MS/MS spectra of PEs contain a loss of 43 Da, corresponding to the azidine (Az) fragment previously described by Hsu and Turk (2000, *J Mass Spectrom*, **35**, 596-606). All spectra are from the Fe<sub>3</sub>O<sub>4</sub> NP only data set.

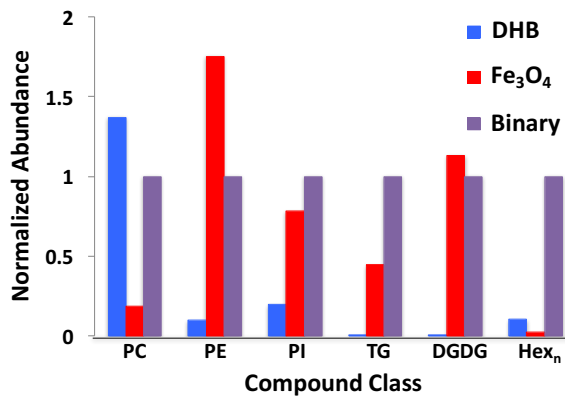

**Figure S3.** Similar data with Figure 3, but from a separate replicate experiment. Some differences from Figure 3 originate from biological and/or analytical variations.

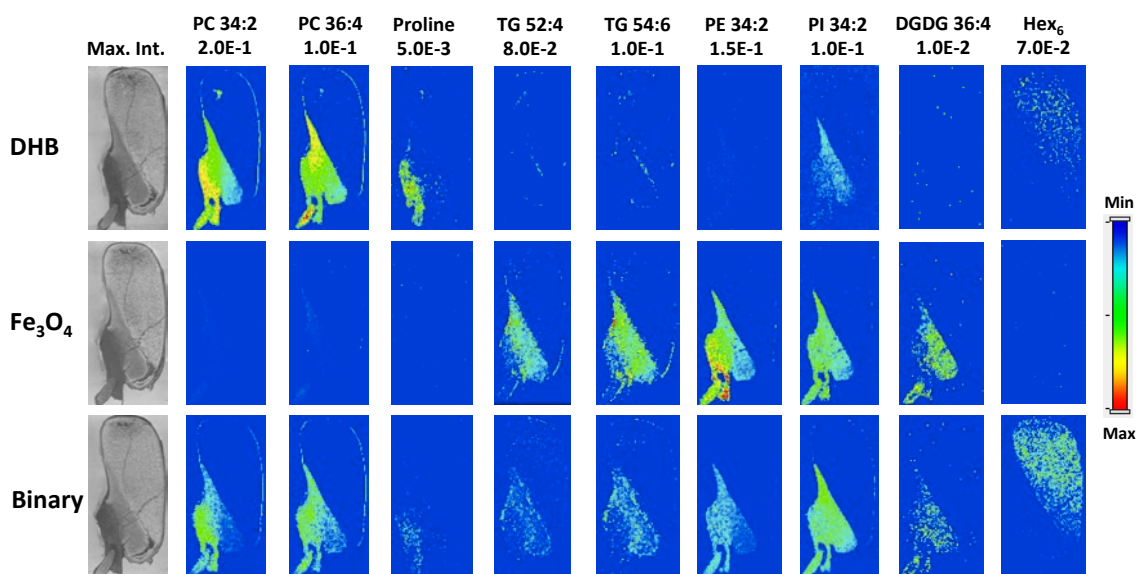

**Figure S4.** The same MS images as in Figure 4B but generated with normalization to the total ion count. The images demonstrate little to no difference with those generated from absolute ion intensity. Detailed parameters for image generation can be found in Table S2.

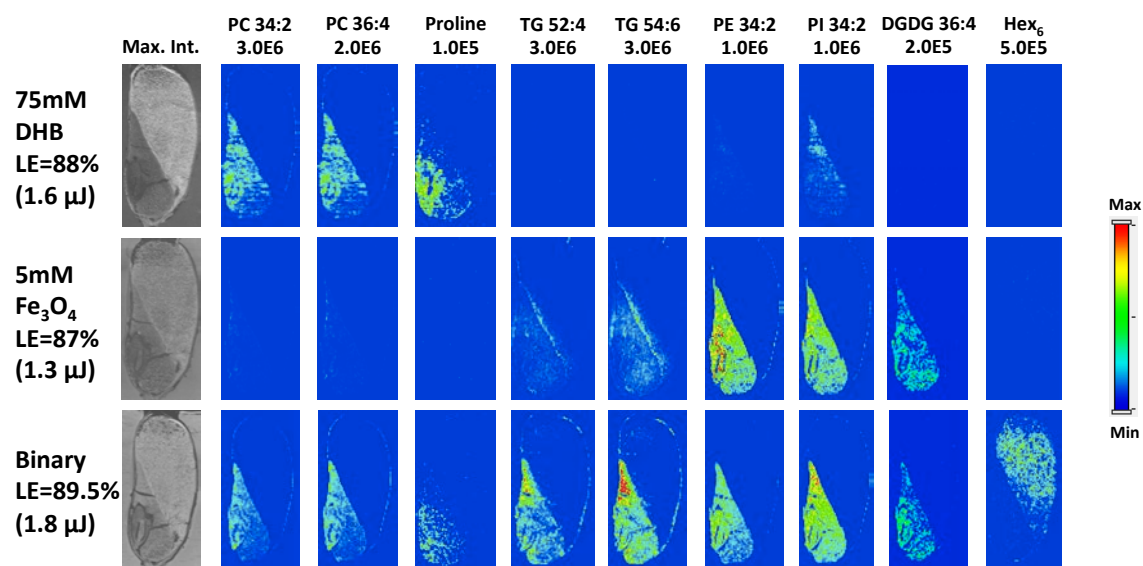

**Figure S5.** Similar MS images as in Figure 4B but from a separate replicate experiment. Detailed parameters for image generation can be found in Table S2.

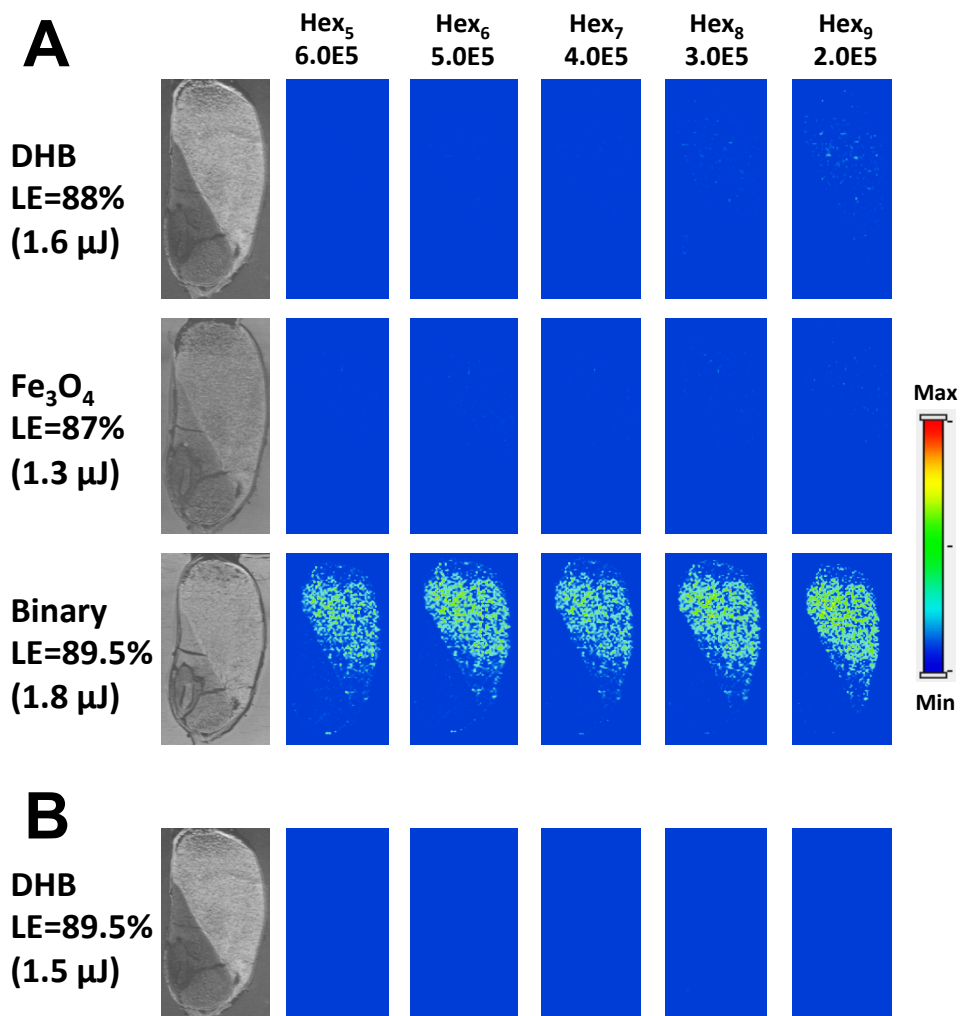

**Figure S6.** A) Similar MS images as in Figure 5, but from a separate replicate experiment. All species are detected as  $[M+K-H_2O]^+$ . B) MS images of various polysaccharides with DHB only matrix at the same laser energy as the binary matrix, demonstrating that the high ion signals of large oligosaccharides in the binary matrix is not due to the high laser energy. Detailed parameters for image generation can be found in Table S2.

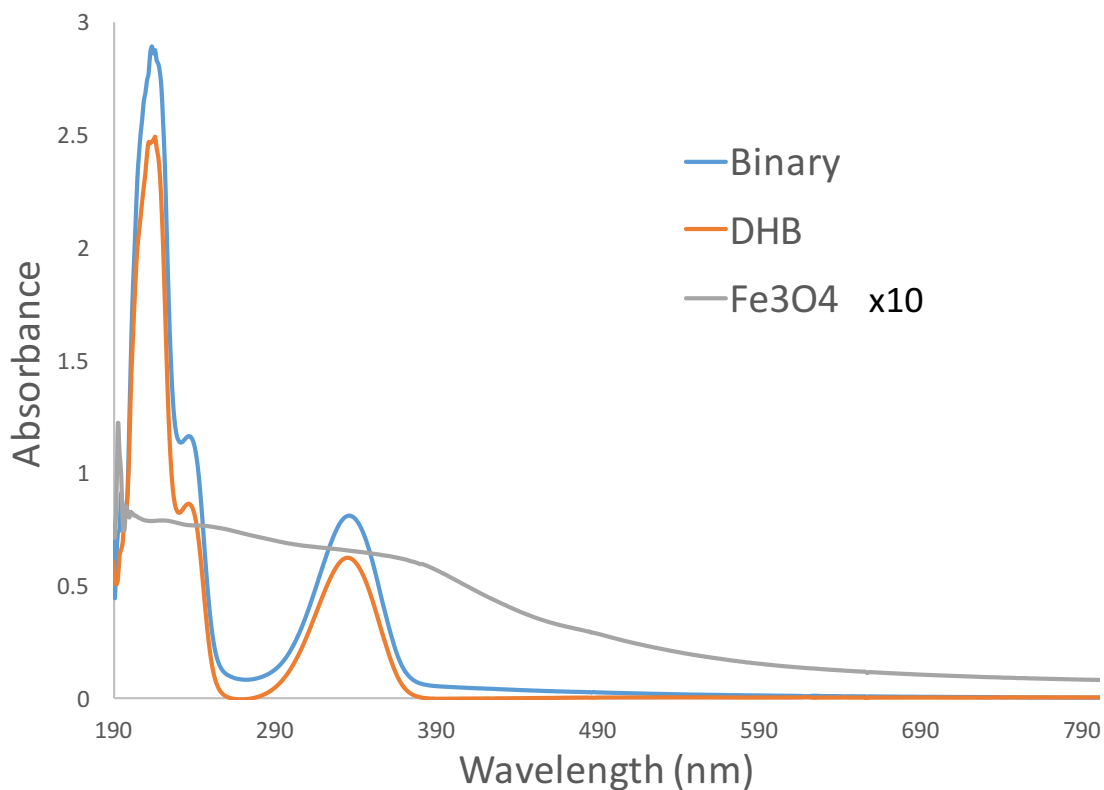

**Figure S7.** UV-Visible Absorption spectra of DHB, Fe<sub>3</sub>O<sub>4</sub> NPs and the binary matrix. DHB and Fe<sub>3</sub>O<sub>4</sub> NPs are at the concentration of 0.175 and 0.125 mM, respectively, and the binary matrix contains 0.175 mM DHB and 0.0125 mM Fe<sub>3</sub>O<sub>4</sub>. This is 400 times dilute concentration than we used in the application to maize seed sections, except the Fe<sub>3</sub>O<sub>4</sub> NPs which is 40 times dilute or 10 times more concentrate than used in the UV-Vis of the binary matrix.

**Table S1.** Assignment of lipid compounds shown in Figure 2.

| Accurate mass<br><i>m/z</i> | Identification                                 | Formula                                                         | Mass Error<br>(ppm) |
|-----------------------------|------------------------------------------------|-----------------------------------------------------------------|---------------------|
| 737.45024                   | PC 34:2+K-N(CH <sub>3</sub> ) <sub>3</sub>     | C <sub>39</sub> H <sub>71</sub> O <sub>8</sub> PK               | -2.1                |
| 749.39153                   | PE 34:2+2K-NC <sub>2</sub> H <sub>5</sub>      | C <sub>37</sub> H <sub>68</sub> O <sub>8</sub> PK <sub>2</sub>  | -0.7                |
| 761.45033                   | PC 36:4+K-N(CH <sub>3</sub> ) <sub>3</sub>     | C <sub>41</sub> H <sub>71</sub> O <sub>8</sub> PK               | -1.9                |
| 763.46628                   | PC 36:3+K-N(CH <sub>3</sub> ) <sub>3</sub>     | C <sub>41</sub> H <sub>73</sub> O <sub>8</sub> PK               | -1.6                |
| 775.40824                   | PC 34:2+2K-N(CH <sub>3</sub> ) <sub>3</sub> -H | C <sub>39</sub> H <sub>70</sub> O <sub>8</sub> PK <sub>2</sub>  | 0.7                 |
| 782.56776                   | PC 36:4+H                                      | C <sub>44</sub> H <sub>81</sub> NO <sub>8</sub> P               | -2.1                |
| 792.43367                   | PE 34:2+2K-H                                   | C <sub>39</sub> H <sub>73</sub> O <sub>8</sub> NPK <sub>2</sub> | -0.7                |
| 796.52383                   | PC 34:2+K                                      | C <sub>42</sub> H <sub>80</sub> NO <sub>8</sub> PK              | -1.9                |
| 798.54036                   | PC 34:1+K                                      | C <sub>42</sub> H <sub>82</sub> NO <sub>8</sub> PK              | -0.8                |
| 816.43377                   | PE 36:4+2K-H                                   | C <sub>41</sub> H <sub>73</sub> O <sub>8</sub> NPK <sub>2</sub> | -0.6                |
| 818.45095                   | PE 36:3+2K-H                                   | C <sub>41</sub> H <sub>75</sub> O <sub>8</sub> NPK <sub>2</sub> | 1.3                 |
| 820.52362                   | PC 36:4+K                                      | C <sub>44</sub> H <sub>80</sub> NO <sub>8</sub> PK              | -2.1                |
| 822.54004                   | PC 36:3+K                                      | C <sub>44</sub> H <sub>82</sub> NO <sub>8</sub> PK              | -1.1                |
| 824.55610                   | PC 36:2+K                                      | C <sub>44</sub> H <sub>84</sub> NO <sub>8</sub> PK              | -0.6                |
| 873.48869                   | PI 34:2+K                                      | C <sub>43</sub> H <sub>79</sub> O <sub>13</sub> PK              | -0.3                |
| 893.69903                   | TG 52:4+K                                      | C <sub>55</sub> H <sub>98</sub> O <sub>6</sub> K                | -0.5                |
| 895.71470                   | TG 52:3+K                                      | C <sub>55</sub> H <sub>100</sub> O <sub>6</sub> K               | -0.5                |
| 911.44480                   | PI 34:2+2K-H                                   | C <sub>43</sub> H <sub>78</sub> O <sub>13</sub> PK <sub>2</sub> | -0.1                |
| 917.69916                   | TG 54:6+K                                      | C <sub>57</sub> H <sub>98</sub> O <sub>6</sub> K                | -0.4                |
| 919.71467                   | TG 54:5+K                                      | C <sub>57</sub> H <sub>100</sub> O <sub>6</sub> K               | -0.5                |
| 921.72997                   | TG 54:4+K                                      | C <sub>57</sub> H <sub>102</sub> O <sub>6</sub> K               | -0.9                |
| 953.55981                   | DGDG (34:3)+K                                  | C <sub>49</sub> H <sub>86</sub> O <sub>15</sub> K               | -0.0                |
| 955.57515                   | DGDG (34:2)+K                                  | C <sub>49</sub> H <sub>88</sub> O <sub>15</sub> K               | -0.3                |
| 957.59055                   | DGDG (34:1)+K                                  | C <sub>49</sub> H <sub>90</sub> O <sub>15</sub> K               | -0.6                |
| 975.54417                   | DGDG (36:6)+K                                  | C <sub>51</sub> H <sub>84</sub> O <sub>15</sub> K               | -0.0                |
| 977.55957                   | DGDG (36:5)+K                                  | C <sub>51</sub> H <sub>86</sub> O <sub>15</sub> K               | -0.3                |
| 979.57579                   | DGDG (36:4)+K                                  | C <sub>51</sub> H <sub>88</sub> O <sub>15</sub> K               | 0.3                 |
| 981.59073                   | DGDG (36:3)+K                                  | C <sub>51</sub> H <sub>90</sub> O <sub>15</sub> K               | -0.4                |



**Table S2.** Parameters used in the generation of MS images.

| Compound                             | <i>m/z</i> | Tolerance | Min Intensity | Max Intensity |
|--------------------------------------|------------|-----------|---------------|---------------|
| Figure 4B                            |            |           |               |               |
| PC 34:2+K                            | 796.525    | .035      | 1.00          | 8.0E5         |
| PC 36:4+K                            | 820.525    | .036      | 1.00          | 4.0E5         |
| Proline+H                            | 116.071    | .002      | 1.00          | 8.0E4         |
| TG 52:4+K                            | 893.700    | .041      | 1.00          | 4.0E5         |
| TG 54:6+K                            | 917.700    | .042      | 1.00          | 7.5E5         |
| PE 34:2+2K-H                         | 792.435    | .034      | 1.00          | 8.0E5         |
| PI 34:2+2K-H                         | 911.445    | .041      | 1.00          | 6.0E5         |
| DGDG 36:4+K                          | 979.576    | .046      | 1.00          | 2.0E5         |
| Hex <sub>6</sub> +K-H <sub>2</sub> O | 1011.280   | .048      | 1.00          | 3.0E5         |
| Figure 5                             |            |           |               |               |
| Hex <sub>5</sub> +K-H <sub>2</sub> O | 849.227    | .037      | 1.00          | 2.0E5         |
| Hex <sub>6</sub> +K-H <sub>2</sub> O | 1011.280   | .048      | 1.00          | 2.0E5         |
| Hex <sub>7</sub> +K-H <sub>2</sub> O | 1173.333   | .062      | 1.00          | 2.0E5         |
| Hex <sub>8</sub> +K-H <sub>2</sub> O | 1335.386   | .079      | 1.00          | 2.0E5         |
| Hex <sub>9</sub> +K-H <sub>2</sub> O | 1497.439   | .088      | 1.00          | 2.0E5         |
| Figure S4                            |            |           |               |               |
| PC 34:2+K                            | 796.525    | .035      | 0.00          | 2.0E-1        |
| PC 36:4+K                            | 820.525    | .036      | 0.00          | 1.0E-1        |
| Proline+H                            | 116.071    | .002      | 0.00          | 5.0E-3        |
| TG 52:4+K                            | 893.700    | .041      | 0.00          | 8.0E-2        |
| TG 54:6+K                            | 917.700    | .042      | 0.00          | 1.0E-1        |
| PE 34:2+2K-H                         | 792.435    | .034      | 0.00          | 1.5E-1        |
| PI 34:2+2K-H                         | 911.445    | .041      | 0.00          | 1.0E-1        |
| DGDG 36:4+K                          | 979.576    | .046      | 0.00          | 1.0E-2        |
| Hex <sub>6</sub> +K-H <sub>2</sub> O | 1011.280   | .048      | 0.00          | 7.0E-2        |
| Figure S5                            |            |           |               |               |
| PC 34:2+K                            | 796.525    | .035      | 1.00          | 3.0E6         |
| PC 36:4+K                            | 820.525    | .036      | 1.00          | 2.0E6         |
| Proline+H                            | 116.071    | .002      | 1.00          | 1.0E5         |
| TG 52:4+K                            | 893.700    | .041      | 1.00          | 3.0E6         |
| TG 54:6+K                            | 917.700    | .042      | 1.00          | 3.0E6         |
| PE 34:2+2K-H                         | 792.435    | .034      | 1.00          | 1.0E6         |

|                                      |          |       |      |       |
|--------------------------------------|----------|-------|------|-------|
| PI 34:2+2K-H                         | 911.445  | .041  | 1.00 | 1.0E6 |
| DGDG 36:4+K                          | 979.576  | .046  | 1.00 | 2.0E5 |
| Hex <sub>6</sub> +K-H <sub>2</sub> O | 1011.280 | .048  | 1.00 | 5.0E5 |
| Figure S6                            |          |       |      |       |
| Hex <sub>5</sub> +K-H <sub>2</sub> O | 849.227  | .037  | 1.00 | 6.0E5 |
| Hex <sub>6</sub> +K-H <sub>2</sub> O | 1011.280 | .048  | 1.00 | 5.0E5 |
| Hex <sub>7</sub> +K-H <sub>2</sub> O | 1173.333 | .062  | 1.00 | 4.0E5 |
| Hex <sub>8</sub> +K-H <sub>2</sub> O | 1335.386 | .079  | 1.00 | 3.0E5 |
| Hex <sub>9</sub> +K-H <sub>2</sub> O | 1497.439 | .010* | 1.00 | 2.0E5 |

\* Tolerance refers to mass windows used in the generation of MS images. Sufficiently large tolerance is used as to be appropriate for corresponding mass resolution at the given mass. In case of [Hex<sub>9</sub>+K-H<sub>2</sub>O]<sup>+</sup>, a narrow tolerance is used to avoid the contribution from a near-by contamination peak.
